# Supplementary material for: Electronic Patient-Generated Health Data to Facilitate Disease Prevention and Health Promotion: Scoping Review
Source: PubMed Central journal article supplement (PMC6914107; doi:10.2196/13320), 2019-10-14
Supplement: jmir_v21i10e13320_app9.pdf [file jmir_v21i10e13320_app9.pdf]

## Multimedia Appendix: PGHD tools and their functionalities

### Identified PGHD hardware types and associated devices

| Hardware                                                                                           | Devices                                                                                                                                                  |
|----------------------------------------------------------------------------------------------------|----------------------------------------------------------------------------------------------------------------------------------------------------------|
| 1. non-health related products that are mostly well-integrated into daily living (n= 157/183, 86%) | Laptop, PC, tablet, mobile phone, personal digital assistant, web cam                                                                                    |
| 2. health-related devices that are less societally penetrated (n=90/183, 49%)                      | Heart rate monitor, pedometer, physical activity trackers, Bluetooth-enabled scale, smart clothing, Carbon Monoxide meter, sleep monitor, energy monitor |
| 3. medical devices (n=15/183, 8%)                                                                  | Glucometer, digital blood pressure monitor                                                                                                               |

### Most commonly addressed functionalities of electronic PGHD-Tools

| PGHD-Tool functions                          | Number of studies reporting functionality |
|----------------------------------------------|-------------------------------------------|
| Enable manual PGHD collection                | n= 143                                    |
| Providing additional intervention components | n= 138                                    |
| PGHD analysis and visualization              | n= 118                                    |
| Provide feedback                             | n= 107                                    |
| Enable data transfer and sharing             | n= 94                                     |
| Automatic PGHD recording                     | n= 89                                     |
| Store PGHD                                   | n= 78                                     |
| Enable interactions and social support       | n= 67                                     |
